# Supplementary material for: Pediatric Out‐of‐Hospital Cardiac Arrest: The Role of the Telecommunicator in Recognition of Cardiac Arrest and Delivery of Bystander Cardiopulmonary Resuscitation
Source: PubMed Central journal article supplement — J Am Heart Assoc. 2024 Jan 12;13(2):e031740. doi: 10.1161/JAHA.123.031740 (PMC10926809; doi:10.1161/jaha.123.031740), 2024-01-12
Supplement: JAH3-13-e031740-s001.pdf [file JAH3-13-e031740-s001.pdf]

# **SUPPLEMENTAL MATERIAL**

**Table S1. Comparison of patient and event characteristics in cases where recording was and was not available for review.**

|                                              | No Recording Available<br>(n=41) | Recording Available<br>(n=185) |        |
|----------------------------------------------|----------------------------------|--------------------------------|--------|
| Age in years, median (IQR)                   | 1 (5)                            | 1 (11)                         |        |
| Female, % (n)                                | 34% (14)                         | 41% (75)                       | p=0.45 |
| Witnessed, % (n)                             | 24% (10)                         | 34% (63)                       | p=0.23 |
| Bystander CPR performed <sup>†</sup> , % (n) | 63% (26)                         | 82% (152)                      | p=0.01 |
| Initial rhythm shockable, % (n)              | 2% (1)                           | 9% (16)                        | p=0.17 |
| Noncardiac etiology, % (n)                   | 83% (34)                         | 71% (132)                      | p=0.13 |
| Outcomes at hospital discharge, % (n)        |                                  |                                |        |
| Survived                                     | 15% (6)                          | 14% (25)                       | p=0.85 |
| CPC 1-2                                      | 7% (3)                           | 12% (22)                       | p=0.40 |

CPC= Cerebral Performance Category

<sup>†</sup>Bystander CPR status relies solely on the EMS report when the 9-1-1 recording is not available.
